# Supplementary material for: FLOWERS: An integral approach to engineering wake models
Source: Copernicus journal article supplement (doi:10.5194/wes-2021-116), 2021-10-26

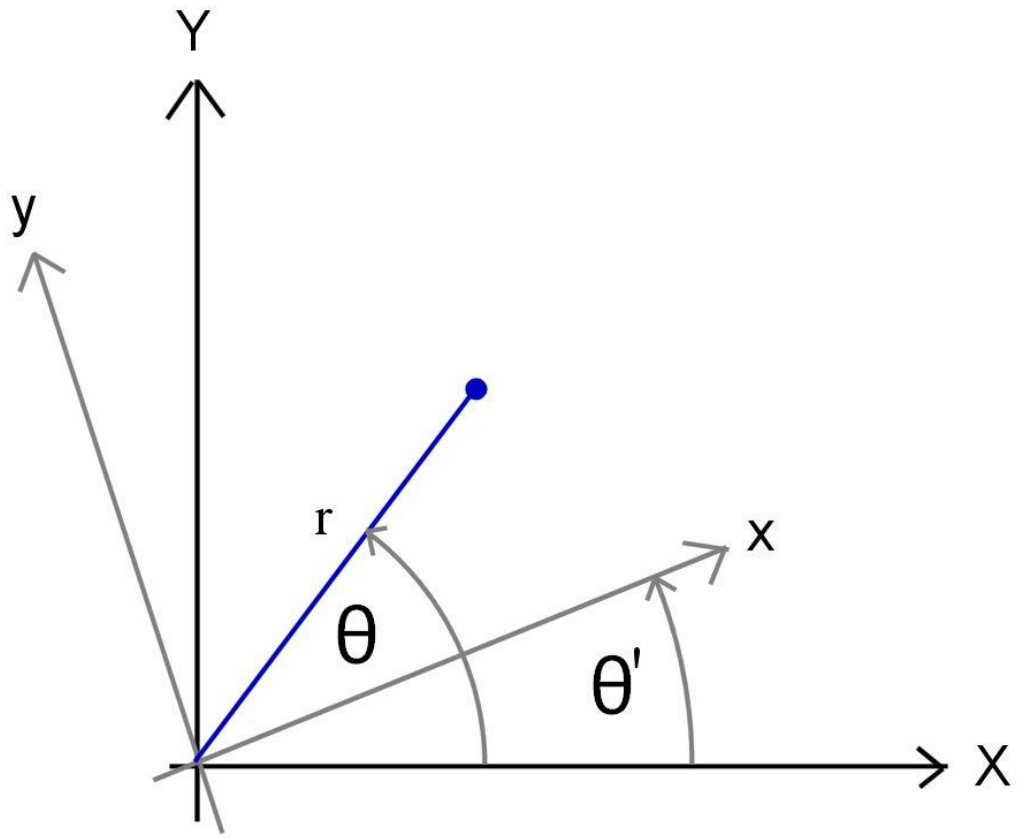

Supplement: Supplementary file [file wes-2021-116-RC1-supplement.pdf]
